# Supplementary material for: Inhibition of CD83 Alleviates Systemic Inflammation in Herpes Simplex Virus Type 1-Induced Behçet's Disease Model Mouse
Source: PubMed Central journal article supplement (PMC6754941; doi:10.1155/2019/5761392), 2019-09-09
Supplement: 5761392.f1.pdf [file 5761392.f1.pdf]

1 **Supplementary Data**

2 **Supplementary Figure S1.**

3

4

5

6

7

8

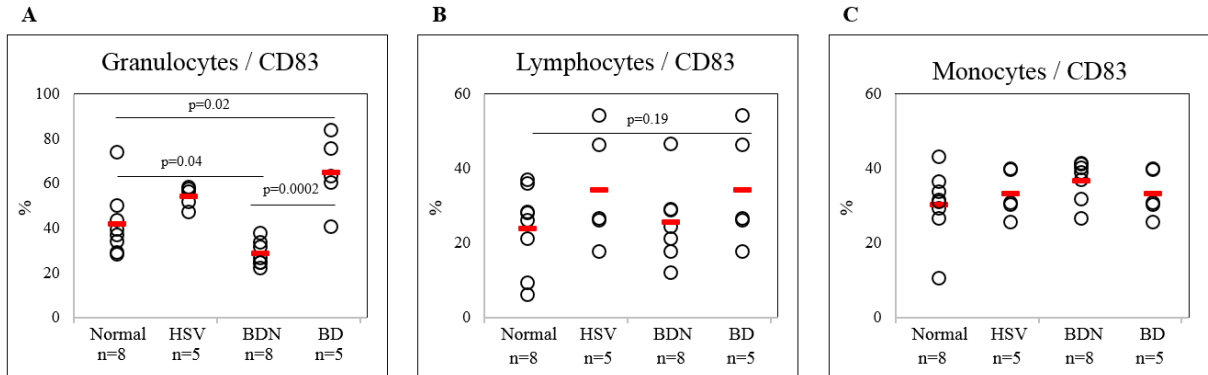

9

10

11

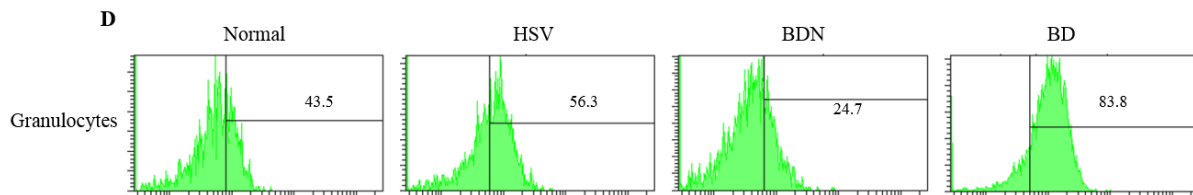

12 **Supplementary Figure 1.** (A-C) Frequencies of CD83+ cells in granulocytes, lymphocytes and  
13 monocytes of normal (n=8), HSV-1 (n=5), BDN (n=8), and BD mice (n=5) were evaluated by  
14 FACS analysis (A-C). (D) Representative histogram of CD83+ cells in granulocytes. n indicates  
15 the number of mice used in each group. The *p*-value was determined by Student's *t*-test.

16

17 **Supplementary Figure S2.**

18

19

20

21

22

23

24

25

26

27

28

29

30

31

32

33

34

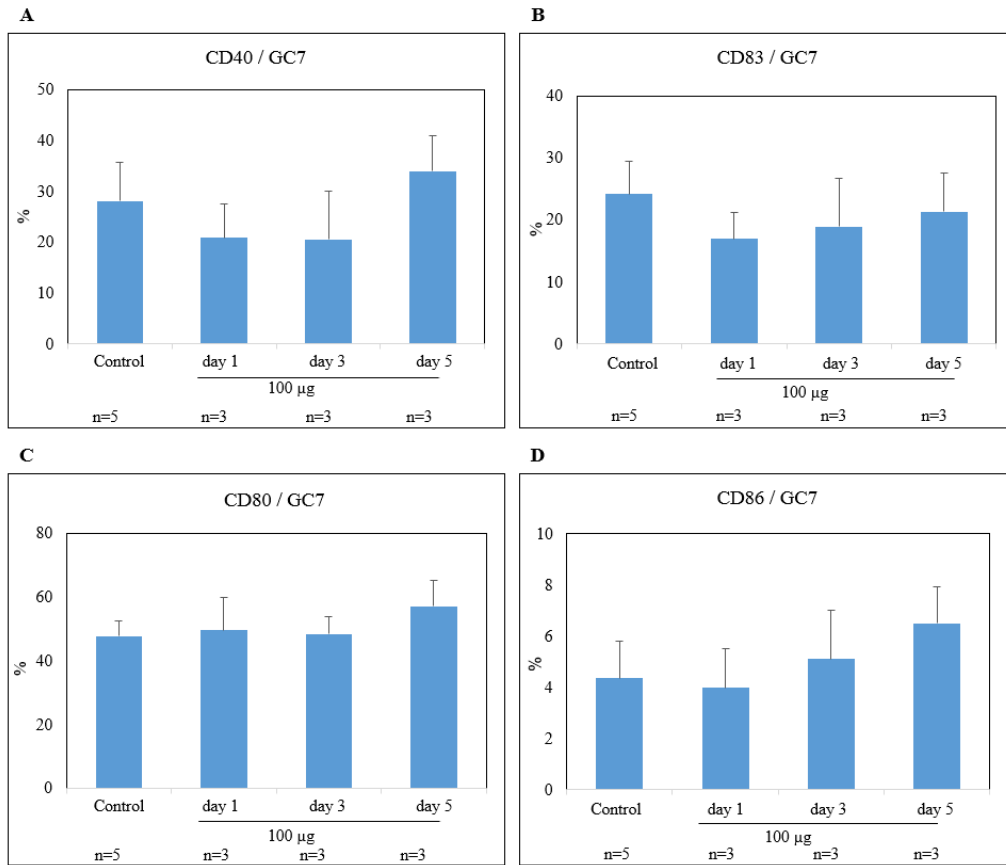

**Supplementary Figure S2.** (A-D) GC7 (*N* 1-guanyl-1,7-diaminoheptane) was used to treat normal mice, and frequencies of CD40, CD83, CD80, and CD86 expressing cells in PBL surface were evaluated by FACS analysis (n=3 in each group).
